# Supplementary material for: Greenland Ice Sheet late-season melt: investigating multiscale drivers of K-transect events
Source: Copernicus journal article supplement (doi:10.5194/tc-13-2241-2019), 2019-08-30
Supplement: Supplementary file 1 [file tc-13-2241-2019-supplement.pdf]

Supplement of The Cryosphere, 13, 2241–2257, 2019  
<https://doi.org/10.5194/tc-13-2241-2019-supplement>  
© Author(s) 2019. This work is distributed under  
the Creative Commons Attribution 4.0 License.

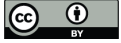

*Supplement of*

## **Greenland Ice Sheet late-season melt: investigating multiscale drivers of K-transect events**

**Thomas J. Ballinger et al.**

*Correspondence to:* Thomas J. Ballinger (tballinger@txstate.edu)

The copyright of individual parts of the supplement might differ from the CC BY 4.0 License.

26

| Year | DOA [d=0]    | DOA Anomaly (d) | DOA [-60,-31]   | DOA [-30,-1]    |
|------|--------------|-----------------|-----------------|-----------------|
| 2011 | 30 Oct (303) | -10.65          | 31 Aug – 29 Sep | 30 Sep – 29 Oct |
| 2012 | 17 Nov (322) | 8.01            | 18 Sep – 17 Oct | 18 Oct – 16 Nov |
| 2013 | 13 Nov (317) | 3.10            | 14 Sep – 13 Oct | 14 Oct – 12 Nov |
| 2014 | 21 Nov (325) | 11.65           | 22 Sep – 21 Oct | 22 Oct – 20 Nov |
| 2015 | 12 Nov (316) | 2.25            | 13 Sep – 12 Oct | 13 Oct – 11 Nov |

27

28 **Table S1.** Baffin Bay sea ice dates of advance (DOA) for each year in the study period (2011-2015) with the day of  
29 year (DOY) in parentheses (column 2), the date anomaly with respect to the 1981 - 2010 mean (column 3), and  
30 annual date windows preceding each respective DOA (column 4 and 5).

31

32

33

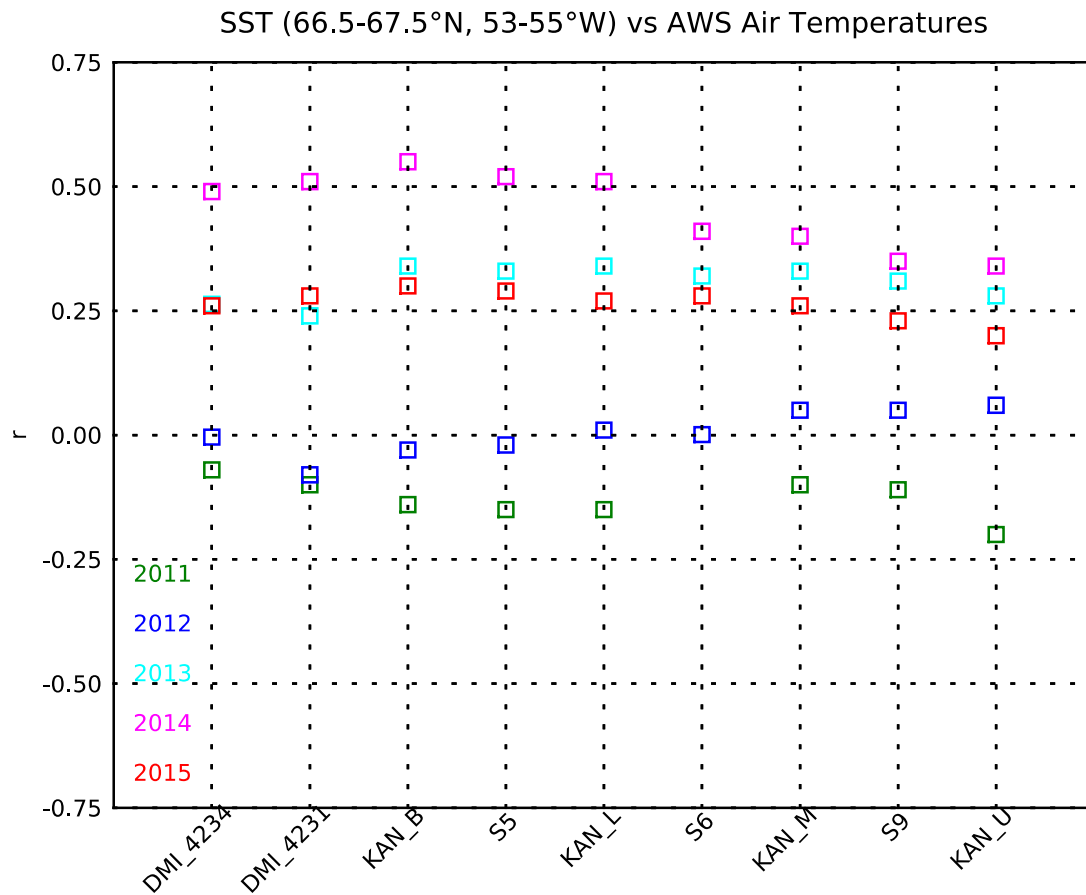

34  
 35 **Figure S1.** Detrended Pearson ( $r$ ) correlation coefficients signaling intraseasonal fluctuations between Danish  
 36 Meteorological Institute (DMI) near-coastal or K-Transect automatic weather station (AWS) air temperatures and sea  
 37 surface temperatures (SST) surrounding Sisimiut (i.e. WMO code 4234). The SST domain matches the local date of  
 38 sea ice advance (DOA) domain outlined in Fig 3a-f. The SST product is described in Ballinger et al. (2018b) and  
 39 DMI air temperatures are from Cappelen (2018, 2019). The coefficients are calculated over the 60-day (i.e. [-60,-1])  
 40 period preceding the DOA from 2011 to 2015 and  $p \leq 0.05$  for  $r \geq |0.26|$ . The S6 coefficient for 2011 is missing due to  
 41 an inadequate number of air temperature values. DMI\_4234 correlation coefficients overlap ( $r=0.26$ ) for 2013 and  
 42 2015.  
 43
